# Supplementary material
Source: PubMed Central journal article supplement (PMC2676334)
Supplement: NIHMS89572-supplement-01.pdf [file NIHMS89572-supplement-01.pdf]

Type of file: table

Label: Appendix

Filename: TIMP-1 Supplemental Table.pdf

**TABLE 1 (Supplement). Genes induced in lungs from WT and TIMP-1 KO mice.**

|                       | Accession # | Forward                      | Reverse                      | Product size (bp) |
|-----------------------|-------------|------------------------------|------------------------------|-------------------|
| Actin                 | NM_007393   | TTGCTGACAGGATG<br>CAGAAGGAGA | ACTCCTGCTTGCT<br>GATCCACATCT | 159               |
| ADAM 33               | NM_033615   | TCTGTCATCGAAGG<br>GGACTG     | CAGAGTTCGCAGG<br>GTCTGAG     | 192               |
| Collagen-1 $\alpha$ 1 | NM_007742   | GATCTCCTGGTGCT<br>GATGGA     | GACCTTGTTTGCC<br>AGGTTCA     | 156               |
| Collagen-1 $\alpha$ 2 | NM_007743   | CCGTGCTTCTCAGA<br>ACATCA     | GAGCAGCCATCGA<br>CTAGGAC     | 168               |
| Collagen-III          | BC058724    | CTGCCATTGCTGGA<br>GTTG       | GCAGCCATCCTCT<br>AGAAC       | 643               |
| Collagen-IV           | NM_009931   | AGGATGCAACGGTA<br>CAAAGGGAGA | TGGCCGAGAATTT<br>CACCAGGATCT | 126               |
| Collagen-V            | NM_016919   | AGAGGAGAATTGGG<br>CTTCCAAGGT | TCTATGCCTGGCA<br>GACCTTGTTCA | 155               |
| Emmperin              | NM_009768   | CAGCCCTCTGGCCC<br>TTCCTA     | CACCACTCAGGTG<br>GCGTTCC     | 197               |

|                     |             |                              |                              |     |
|---------------------|-------------|------------------------------|------------------------------|-----|
| Eotaxin             | NM_011330   | TATTCCTGCTGCTC<br>ACGGTCACTT | GGCTTTCAGGGTG<br>CATCTGTTGTT | 161 |
| I CAM               | NM_010493   | AGATCACATTCACG<br>GTGCTGGCTA | AGCTTTGGGATGG<br>TAGCTGGAAGA | 160 |
| IL-4                | NM_021283   | AGCCATATCCACGG<br>ATGCGACAAA | AATATGCGAAGCA<br>CCTTGGAAGCC | 176 |
| IL-5                | NM_010558   | GATGGAACCCAAGG<br>CTTTGTGCAT | TCACCCTTGGCTAC<br>ACACTGAGTT | 125 |
| IL-6                | NM_031168   | ATCCAGTTGCCTTC<br>TTGGGACTGA | TAAGCCTCCGACTT<br>GTGAAGTGGT | 134 |
| IL-10               | NM_010548   | TGAATTCCTGGGT<br>GAGAAGCTGA  | TGGCCTTGTAGAC<br>ACCTTGGTCTT | 147 |
| IL-12               | NM_008351   | CGCGTCGTGACCAT<br>CAACAG     | TGCCACCTTTGGG<br>GAGATGA     | 197 |
| IL-13               | NM_008355   | TGAGGAGCTGAGCA<br>ACATCACACA | TGCGGTTACAGAG<br>GCCATGCAATA | 176 |
| IL-18               | NM_008360   | TGGTTCCATGCTTT<br>CTGGACTCCT | TTCCTGGGCCAAG<br>AGGAAGTGATT | 132 |
| Interferon $\gamma$ | NM_008337   | GATTCGGGGTGGG<br>GAAGAGA     | CCCCGCAATCACA<br>GTCTTGG     | 180 |
| Laminin             | NM_008481.1 | AGCTTCCTCTGGAT<br>TGTTGGCTCT | ACCATACTGGCTTT<br>GGGTCCATCT | 155 |

|               |           |                                |                                |     |
|---------------|-----------|--------------------------------|--------------------------------|-----|
| MMP-2         | NM_008610 | TCCTGGAATGCCAT<br>CCCTGATAAC   | TGAAGAACCAGAA<br>GAGTGGAGCAC   | 442 |
| MMP-9         | NM_013599 | CTCTGGACGTCAAA<br>TGTGGGTGTA   | ACTGGAAGATGTC<br>GTGTGAGTTCC   | 254 |
| MMP-12        | NM_008605 | AAGCAACTGGGCAA<br>CTGGACAACCTC | TGGTGACAGAAAG<br>TTGATGGTGGAC  | 631 |
| MT1-MMP       | NN-008608 | AGGGGACTGAGGA<br>GGAGACA       | GAACGCTGGCAGT<br>AAAGCAG       | 184 |
| RANTES        | BC033508  | ACCCAGAAGAAGTG<br>GGTTCAAG     | GCTGATTTCTTGG<br>GTTTGCTGTGC   | 215 |
| TIMP-1        | NM_011593 | GCATCTGGCATCCT<br>CTTGTTG      | GACAGTGTTCCAGG<br>CTTCAGTTTTTC | 637 |
| TIMP-2        | NM_011594 | GCAACAGGCGTTTT<br>GCAATGCAGAC  | GCTTTTCAATTGG<br>CCACAGGGGCT   | 598 |
| TNF- $\alpha$ | NM_013693 | GGGCAGGTCTACTT<br>TGGAGTCATT   | ATTCTGAGACAGA<br>GGCAACCTGAC   | 354 |
| V-CAM 1       | NM_011693 | CCAGCTCATGAACA<br>GACAGGAGTT   | CTTGAAGCCTTGT<br>GGAGGGATGTA   | 245 |
